# Supplementary material
Source: HighWire-hosted journal article supplement (https://erj.ersjournals.com/content/57/1/2001756)
Supplement: inline-supplementary-material-1 [file inline-supplementary-material-1.pdf]

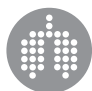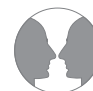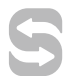

SHAREABLE PDF

# Pragmatic global dosing recommendations for the 3-month, once-weekly rifapentine and isoniazid preventive TB regimen in children

Kendra K. Radtke <sup>1</sup>, Jennifer E. Hibma<sup>1</sup>, Anneke C. Hesselning<sup>2</sup> and Rada M. Savic<sup>1</sup>

**Affiliations:** <sup>1</sup>Dept of Bioengineering and Therapeutic Sciences, University of California, San Francisco, CA, USA. <sup>2</sup>Desmond Tutu TB Centre, Dept of Paediatrics and Child Health, Faculty of Medicine and Health Sciences, Stellenbosch University, Cape Town, South Africa.

**Correspondence:** Rada M. Savic, 1700 4th St, Rm 503C, UCSF Box 2552 San Francisco, CA 94158, USA.  
E-mail: rada.savic@ucsf.edu

 @ERSpublications

**This study proposes a revised synchronised and pragmatic dosing table for the 3HP regimen in children that utilises available formulations. The revised doses are predicted to deliver adequate rifapentine and isoniazid exposure in children.** <https://bit.ly/3eUHm86>

**Cite this article as:** Radtke KK, Hibma JE, Hesselning AC, *et al.* Pragmatic global dosing recommendations for the 3-month, once-weekly rifapentine and isoniazid preventive TB regimen in children. *Eur Respir J* 2021; 57: 2001756 [<https://doi.org/10.1183/13993003.01756-2020>].

This single-page version can be shared freely online.

## *To the Editor:*

The End TB Strategy, proposed by the World Health Organization (WHO) in 2014, calls for a 90% reduction in tuberculosis (TB)-related deaths and an 80% reduction in TB incidence by 2030 [1]. TB remains a leading cause of death in children under 5 years of age [2], and interventions to eliminate preventable child deaths from TB are urgently needed. Additional and effective TB prevention measures are crucial for the End TB Strategy goals to be met [3].
